# Supplementary material for: Be Aware of Aggregators in the Search for Potential Human ecto-5′-Nucleotidase Inhibitors
Source: PubMed Central journal article supplement (PMC6222861; doi:10.3390/molecules23081876), 2018-07-27
Supplement: molecules-23-01876-s001.pdf [file molecules-23-01876-s001.pdf]

# Be Aware of Aggregators in the Search for Potential Human *ecto*-5'-nucleotidase Inhibitors

As described in the manuscript, 49 known *ecto*-5'-NT inhibitors (here named **LIT-01** to **LIT-49**) were grouped in three clusters, according to Aggregator Advisor tool [1] results:

- **Cluster 1 (Table S1):** compounds that (i) were not found to be similar to any previously reported aggregator and (ii) have calculated LogP values lower than 3.
- **Cluster 2 (Table S2):** compounds that (i) were found to be similar to one previously reported aggregator and (ii) have calculated LogP values lower than 3.
- **Cluster 3 (Table S3):** compounds that (i) were not found to be similar to any previously reported aggregator and (ii) have calculated LogP values higher than 3.

**Table S1.** Chemical structures of compounds grouped as **Cluster 1 (LIT-01 to LIT-12).**

| Compound (ID)           | Structure                                                                                                                                                      | Ref. |
|-------------------------|----------------------------------------------------------------------------------------------------------------------------------------------------------------|------|
| <b>LIT-01</b>           |                                                                                                                                                                | [2]  |
| <b>LIT-02</b>           |                                                                                                                                                                | [3]  |
| <b>LIT-03 to LIT-05</b> | <p><b>LIT-03:</b> X=O and R = CH<sub>2</sub>CH<sub>3</sub>,<br/> <b>LIT-04:</b> X=O and R = Bez<sup>2</sup><br/> <b>LIT-05:</b> X=S and R =Bez<sup>2</sup></p> | [3]  |
| <b>LIT-06</b>           |                                                                                                                                                                | [3]  |
| <b>LIT-07</b>           |                                                                                                                                                                | [3]  |
| <b>LIT-08</b>           |                                                                                                                                                                | [4]  |
| <b>LIT-09</b>           |                                                                                                                                                                | [4]  |

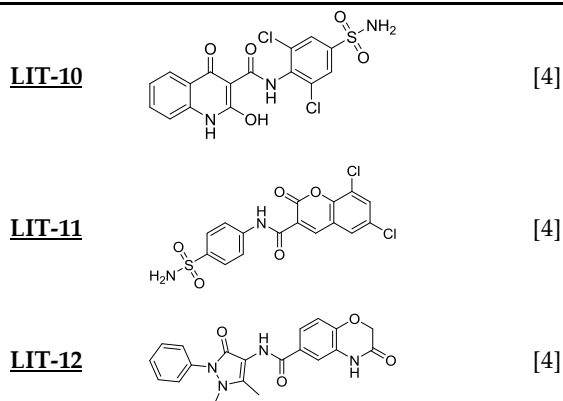

<sup>1</sup>Values calculated using Aggregator Advisor Tool (online available at <http://advisor.bkslab.org/>) [1].

<sup>2</sup>Bez: benzyl group

**Table S2.** Chemical structures of compounds grouped as **Cluster 2 (LIT-13 to LIT-44)**, chemical structures of some previously reported aggregators, and the corresponding Tanimoto similarity index values (%), obtained using Aggregator Advisor tool.

| Compound (ID)           | Structure                                                                                                                                                                                                                                                                                                                                                                                                                                                                                                                                                                                                                                                                    | Ref. | Previously reported aggregator (structure) | Ref. | Tanimoto similarity index value (%) <sup>1</sup> |
|-------------------------|------------------------------------------------------------------------------------------------------------------------------------------------------------------------------------------------------------------------------------------------------------------------------------------------------------------------------------------------------------------------------------------------------------------------------------------------------------------------------------------------------------------------------------------------------------------------------------------------------------------------------------------------------------------------------|------|--------------------------------------------|------|--------------------------------------------------|
| <b>LIT-13</b>           |                                                                                                                                                                                                                                                                                                                                                                                                                                                                                                                                                                                                                                                                              | [5]  |                                            | [6]  | 75                                               |
| <b>LIT-14</b>           |                                                                                                                                                                                                                                                                                                                                                                                                                                                                                                                                                                                                                                                                              | [7]  |                                            | [6]  | 74                                               |
| <b>LIT-15</b>           |                                                                                                                                                                                                                                                                                                                                                                                                                                                                                                                                                                                                                                                                              | [2]  |                                            | [6]  | 73                                               |
| <b>LIT-16 to LIT-23</b> | <p><b>LIT-16:</b> R<sub>1</sub> = H and R<sub>2</sub> = CH<sub>3</sub><br/> <b>LIT-17:</b> R<sub>1</sub> = H and R<sub>2</sub> = CH<sub>2</sub>CH<sub>3</sub><br/> <b>LIT-18:</b> R<sub>1</sub> = R<sub>2</sub> = CH<sub>3</sub><br/> <b>LIT-19:</b> R<sub>1</sub> = R<sub>2</sub> = CH<sub>2</sub>CH<sub>3</sub><br/> <b>LIT-20:</b> R<sub>1</sub> = CH<sub>3</sub> and R<sub>2</sub> = CH<sub>2</sub>CH<sub>3</sub><br/> <b>LIT-21:</b> R<sub>1</sub> = H and R<sub>2</sub> = Phe<sup>2</sup><br/> <b>LIT-22:</b> R<sub>1</sub> = CH<sub>2</sub>CH<sub>3</sub> and R<sub>2</sub> = Bez<sup>3</sup><br/> <b>LIT-23:</b> R<sub>1</sub> = R<sub>2</sub> = Bez<sup>3</sup></p> | [3]  |                                            | [6]  | 71 to 78                                         |
| <b>LIT-24 to LIT-28</b> | <p><b>LIT-24:</b> R = H<br/> <b>LIT-25:</b> R = Cl,<br/> <b>LIT-26:</b> R = NH<sub>2</sub><br/> <b>LIT-27:</b> R = SO<sub>2</sub>NH<sub>2</sub><br/> <b>LIT-28:</b> R = NO<sub>2</sub></p>                                                                                                                                                                                                                                                                                                                                                                                                                                                                                   | [3]  |                                            | [6]  | 71 to 74                                         |

|                         |                                                                                                                                                                                                                                                                                                                          |     |  |     |          |
|-------------------------|--------------------------------------------------------------------------------------------------------------------------------------------------------------------------------------------------------------------------------------------------------------------------------------------------------------------------|-----|--|-----|----------|
| <b>LIT-29</b>           |                                                                                                                                                                                                                                                                                                                          | [3] |  | [6] | 75       |
| <b>LIT-30 to LIT-33</b> |                                                                                                                                                                                                                                                                                                                          | [3] |  | [6] | 70 or 71 |
|                         | <b>LIT-30:</b> R <sub>1</sub> = H and R <sub>2</sub> = Cl<br><b>LIT-31:</b> R <sub>1</sub> = H and R <sub>2</sub> = Br<br><b>LIT-32:</b> R <sub>1</sub> = H and R <sub>2</sub> = NHCH <sub>3</sub><br><b>LIT-33:</b> R <sub>1</sub> = Bez and R <sub>2</sub> = Br                                                        |     |  |     |          |
| <b>LIT-34 to LIT-36</b> |                                                                                                                                                                                                                                                                                                                          | [3] |  | [6] | 71       |
|                         | <b>LIT-34:</b> R <sub>1</sub> = R <sub>2</sub> = Cl<br><b>LIT-35:</b> R <sub>1</sub> = R <sub>2</sub> = Br<br><b>LIT-36:</b> R <sub>1</sub> = CH <sub>3</sub> and R <sub>2</sub> = OH                                                                                                                                    |     |  |     |          |
| <b>LIT-37 to LIT-40</b> |                                                                                                                                                                                                                                                                                                                          | [3] |  | [6] | 72 to 74 |
|                         | <b>LIT-37:</b> R <sub>1</sub> = H and R <sub>2</sub> = CH <sub>3</sub><br><b>LIT-38:</b> R <sub>1</sub> = H and R <sub>2</sub> = CH <sub>2</sub> CH <sub>3</sub><br><b>LIT-39:</b> R <sub>1</sub> = R <sub>2</sub> = CH <sub>3</sub><br><b>LIT-40:</b> R <sub>1</sub> = R <sub>2</sub> = CH <sub>2</sub> CH <sub>3</sub> |     |  |     |          |
| <b>LIT-41</b>           |                                                                                                                                                                                                                                                                                                                          | [4] |  | [6] | 74       |
| <b>LIT-42</b>           |                                                                                                                                                                                                                                                                                                                          | [4] |  | [6] | 71       |
| <b>LIT-43</b>           |                                                                                                                                                                                                                                                                                                                          | [4] |  | [6] | 75       |
| <b>LIT-44</b>           |                                                                                                                                                                                                                                                                                                                          | [8] |  |     | 100      |

<sup>1</sup>Values calculated using Aggregator Advisor Tool (online available at <http://advisor.bkslab.org/>) [1].

<sup>2</sup>Phe: phenyl group

<sup>3</sup>Bez: benzyl group

**Table S3.** Chemical structures of compounds grouped as **Cluster 3 (LIT-45 to LIT-49)**, and their corresponding calculated LogP values, obtained using Aggregator Advisor tool.

| Compound (ID) | Structure | Ref. | Calculated LogP value <sup>1</sup> |
|---------------|-----------|------|------------------------------------|
| <u>LIT-45</u> |           | [9]  | 3.1                                |
| <u>LIT-46</u> |           | [9]  | 4.3                                |
| <u>LIT-47</u> |           | [4]  | 3.3                                |
| <u>LIT-48</u> |           | [4]  | 4.4                                |
| <u>LIT-49</u> |           | [4]  | 5.1                                |

<sup>1</sup>Values calculated using Aggregator Advisor Tool (online available at <http://advisor.bkslab.org/>) [1].

## References

- Irwin, J. J.; Duan, D.; Torosyan, H.; Doak, A. K.; Ziebart, K. T.; Sterling, T.; Tumanian, G.; Shoichet, B. K. An Aggregation Advisor for Ligand Discovery. *J. Med. Chem.* **2015**, *58*, 7076–7087, doi:10.1021/acs.jmedchem.5b01105.
- Knapp, K.; Zebisch, M.; Pippel, J.; El-Tayeb, A.; Müller, C. E.; Sträter, N. Crystal structure of the human ecto-5'-nucleotidase (CD73): Insights into the regulation of purinergic signaling. *Structure* **2012**, *20*, 2161–2173, doi:10.1016/j.str.2012.10.001.
- Bhattarai, S.; Freundlieb, M.; Pippel, J.; Meyer, A.; Abdelrahman, A.; Fiene, A.; Lee, S.-Y.; Zimmermann, H.; Yegutkin, G. G.; Sträter, N.; El-Tayeb, A.; Müller, C. E.  $\alpha,\beta$ -Methylene-ADP (AOPCP) Derivatives and Analogues: Development of Potent and Selective ecto -5'-Nucleotidase (CD73) Inhibitors. *J. Med. Chem.* **2015**, *58*, 6248–6263, doi:10.1021/acs.jmedchem.5b00802.
- Ripphausen, P.; Freundlieb, M.; Brunschweiger, A.; Zimmermann, H.; Müller, C. E.; Bajorath, J. Virtual Screening Identifies Novel Sulfonamide Inhibitors of ecto -5'-Nucleotidase. *J. Med. Chem.* **2012**, *55*, 6576–6581, doi:10.1021/jm300658n.
- Freundlieb, M.; Zimmermann, H.; Müller, C. E. A new, sensitive ecto-5' nucleotidase assay for compound screening. *Anal. Biochem.* **2014**, *446*, 53–58, doi:10.1016/j.ab.2013.10.012.
- Ferreira, R. S.; Simeonov, A.; Jadhav, A.; Eidam, O.; Mott, B. T.; Keiser, M. J.; McKerrow, J. H.; Maloney, D. J.; Irwin, J. J.; Shoichet, B. K. Complementarity between a docking and a high-throughput screen in discovering new cruzain inhibitors. *J. Med. Chem.* **2010**, *53*, 4891–4905, doi:10.1021/jm100488w.
- Iqbal, J.; Jirovsky, D.; Lee, S. Y.; Zimmermann, H.; Müller, C. E. Capillary electrophoresis-based nanoscale assays for monitoring ecto-5' nucleotidase activity and inhibition in preparations of

- recombinant enzyme and melanoma cell membranes. *Anal. Biochem.* **2008**, *373*, 129–140, doi:10.1016/j.ab.2007.09.028.
8. Braganhol, E.; Tamajusuku, A. S. K.; Bernardi, A.; Wink, M. R.; Battastini, A. M. O. Ecto-5'-nucleotidase/CD73 inhibition by quercetin in the human U138MG glioma cell line. *Biochim. Biophys. Acta - Gen. Subj.* **2007**, *1770*, 1352–1359, doi:10.1016/j.bbagen.2007.06.003.
  9. Baqi, Y.; Lee, S.; Iqbal, J.; Ripphausen, P.; Lehr, A.; Scheiff, A. B.; Zimmermann, H.; Bajorath, J.; Müller, C. E. Development of Potent and Selective Inhibitors of ecto -5'-Nucleotidase Based on an Anthraquinone Scaffold. *J. Med. Chem.* **2010**, *53*, 2076–2086, doi:10.1021/jm901851t.
